# Supplementary material for: Chlorhexidine – a commonly used but often neglected culprit of dialysis associated anaphylactic reactions (case report)
Source: Springer Nature journal article supplement (doi:10.1186/s12882-021-02646-x), 2022-01-06
Supplement: MOESM1 [file 20007724]

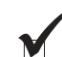

| Topic                       | Item | Checklist item description                                                                             | Reported on Line                                                    |
|-----------------------------|------|--------------------------------------------------------------------------------------------------------|---------------------------------------------------------------------|
| Title                       | 1    | The diagnosis or intervention of primary focus followed by the words “case report”                     | Page 1, Line 2                                                      |
| Key Words                   | 2    | 2 to 5 key words that identify diagnoses or interventions in this case report, including “case report” | Page 3, Line 4                                                      |
| Abstract<br>(no references) | 3a   | Introduction: What is unique about this case and what does it add to the scientific literature?        | Page 2, Line 8 - 23                                                 |
|                             | 3b   | Main symptoms and/or important clinical findings                                                       | Page 2, Line 8 – 23                                                 |
|                             | 3c   | The main diagnoses, therapeutic interventions, and outcomes                                            | Page 2, Line 8 - 23                                                 |
|                             | 3d   | Conclusion—What is the main “take-away” lesson(s) from this case?                                      | Page 3, Line 2 - 3                                                  |
| Introduction                | 4    | One or two paragraphs summarizing why this case is unique ( <b>may include references</b> )            | Page 4, Line 12 - 20                                                |
| Patient Information         | 5a   | De-identified patient specific information.                                                            | Page 4, Line 22. Page 7, Line 16                                    |
|                             | 5b   | Primary concerns and symptoms of the patient.                                                          | Page 4, Line 22. Page 7, Line 16                                    |
|                             | 5c   | Medical, family, and psycho-social history including relevant genetic information                      | Page 4, Line 22. Page 7, Line 16                                    |
|                             | 5d   | Relevant past interventions with outcomes                                                              | NA                                                                  |
| Clinical Findings           | 6    | Describe significant physical examination (PE) and important clinical findings.                        | Page 5, Line 6. Page 7, Line 21                                     |
| Timeline                    | 7    | Historical and current information from this episode of care organized as a timeline                   | Table 1 and Table 2                                                 |
| Diagnostic Assessment       | 8a   | Diagnostic testing (such as PE, laboratory testing, imaging, surveys).                                 | Page 6, Line 14. Page 8, Line 5                                     |
|                             | 8b   | Diagnostic challenges (such as access to testing, financial, or cultural)                              | NA                                                                  |
|                             | 8c   | Diagnosis (including other diagnoses considered)                                                       | Page 7, Line 11. Page 8, Line 12                                    |
|                             | 8d   | Prognosis (such as staging in oncology) where applicable                                               | NA                                                                  |
| Therapeutic Intervention    | 9a   | Types of therapeutic intervention (such as pharmacologic, surgical, preventive, self-care)             | Page 5, Line 12. Page 8, Line 9                                     |
|                             | 9b   | Administration of therapeutic intervention (such as dosage, strength, duration)                        | Page 5, Line 12. Page 8, Line 9                                     |
|                             | 9c   | Changes in therapeutic intervention (with rationale)                                                   | NA                                                                  |
| Follow-up and Outcomes      | 10a  | Clinician and patient-assessed outcomes (if available)                                                 | Page 7, Line 19. Page 10, Line 11                                   |
|                             | 10b  | Important follow-up diagnostic and other test results                                                  | NA                                                                  |
|                             | 10c  | Intervention adherence and tolerability (How was this assessed?)                                       | NA                                                                  |
|                             | 10d  | Adverse and unanticipated events                                                                       | NA                                                                  |
| Discussion                  | 11a  | A scientific discussion of the strengths AND limitations associated with this case report              | Page 10, Line 12 – Page 12, Line 16                                 |
|                             | 11b  | Discussion of the relevant medical literature <b>with references</b> .                                 | Page 10, Line 12 – Page 12, Line 16                                 |
|                             | 11c  | The scientific rationale for any conclusions (including assessment of possible causes)                 | Page 10, Line 12 – Page 12, Line 16                                 |
|                             | 11d  | The primary “take-away” lessons of this case report (without references) in a one paragraph conclusion | Page 12, Line 6 - 10                                                |
| Patient Perspective         | 12   | The patient should share their perspective in one to two paragraphs on the treatment(s) they received  | NA                                                                  |
| Informed Consent            | 13   | Did the patient give informed consent? Please provide if requested                                     | Yes <input checked="" type="checkbox"/> No <input type="checkbox"/> |
